# Supplementary material
Source: Research Square preprint supplement (doi:10.21203/rs.3.rs-9069316/v1)

## Supplementary Materials

### Functional and metabolomic profiling supports rational selection of probiotic strains for the gut–skin axis

Tamara Aleksandrzyk-Piekarczyk<sup>1,\*</sup>, Aleksandra Tymoszevska<sup>2</sup>, Mariusz Radkiewicz<sup>1</sup>, Agnieszka K. Szczepankowska<sup>1</sup>, Emilia Samborowska<sup>1</sup>, Anna Koryszewska-Bagińska<sup>3</sup>, Bożena Cukrowska<sup>4</sup>

<sup>1</sup>Institute of Biochemistry and Biophysics, Polish Academy of Sciences, Pawińskiego 5A, 02-106 Warsaw, Poland

<sup>2</sup>Microbiota Lab, Department of Pharmaceutical Microbiology and Bioanalysis, Faculty of Pharmacy, Medical University of Warsaw, Banacha 1B, 02-097 Warsaw, Poland

<sup>3</sup>Department of Medical Biology, Medical University of Warsaw, Litewska 14/16, 00-575 Warsaw, Poland

<sup>4</sup>Department of Research and Development, Nordic Biotic Ltd., Złota Street 59, 00-120 Warsaw, Poland

\*Corresponding author, tamara@ibb.waw.pl

**Table S1. Antagonistic activity scores (spot-on-lawn assay).** Semi-quantitative inhibition scores (0–1) for each producer–indicator combination are shown for three independent biological replicates (t1–t3; separate cultures prepared on different days), together with the mean ± SD (standard deviation) and coefficient of variation (CV = SD/mean). CV is reported as NA (not applicable) when mean = 0. Score definition: 0, no inhibition; 0.1–0.3, weak; 0.4–0.6, moderate; 0.7–1.0, strong.

| Indicator          | Producer             | Replicates (t1,t2,t3) | Mean ± SD   | CV   |
|--------------------|----------------------|-----------------------|-------------|------|
| P. acnes 2334      | B. bifidum BF030     | 0, 0, 0               | 0.00 ± 0.00 | NA   |
| P. acnes 2334      | B. breve SCN03       | 0, 0, 0               | 0.00 ± 0.00 | NA   |
| P. acnes 2334      | B. lactis BIO40      | 0, 0, 0               | 0.00 ± 0.00 | NA   |
| P. acnes 2334      | B. longum BL020      | 0, 0, 0               | 0.00 ± 0.00 | NA   |
| P. acnes 2334      | L. acidophilus LA120 | 0, 0, 0               | 0.00 ± 0.00 | NA   |
| P. acnes 2334      | L. casei LC130       | 0, 0, 0               | 0.00 ± 0.00 | NA   |
| P. acnes 2334      | L. fermentum LF160   | 0.2, 0.3, 0.2         | 0.23 ± 0.06 | 0.25 |
| P. acnes 2334      | L. paracasei LPC100  | 0, 0, 0               | 0.00 ± 0.00 | NA   |
| P. acnes 2334      | L. plantarum SCN02   | 0, 0, 0               | 0.00 ± 0.00 | NA   |
| P. acnes 2334      | L. reuteri LU150     | 0, 0, 0               | 0.00 ± 0.00 | NA   |
| P. acnes 2334      | L. rhamnosus SCN01   | 1, 0.9, 1             | 0.97 ± 0.06 | 0.06 |
| P. acnes 2400      | B. bifidum BF030     | 0, 0, 0               | 0.00 ± 0.00 | NA   |
| P. acnes 2400      | B. breve SCN03       | 0, 0, 0               | 0.00 ± 0.00 | NA   |
| P. acnes 2400      | B. lactis BIO40      | 0, 0, 0               | 0.00 ± 0.00 | NA   |
| P. acnes 2400      | B. longum BL020      | 0, 0, 0               | 0.00 ± 0.00 | NA   |
| P. acnes 2400      | L. acidophilus LA120 | 0, 0, 0               | 0.00 ± 0.00 | NA   |
| P. acnes 2400      | L. casei LC130       | 0.2, 0.3, 0.2         | 0.23 ± 0.06 | 0.25 |
| P. acnes 2400      | L. fermentum LF160   | 1, 1, 0.8             | 0.93 ± 0.12 | 0.12 |
| P. acnes 2400      | L. paracasei LPC100  | 1, 0.9, 1             | 0.97 ± 0.06 | 0.06 |
| P. acnes 2400      | L. plantarum SCN02   | 0.3, 0.2, 0.3         | 0.27 ± 0.06 | 0.22 |
| P. acnes 2400      | L. reuteri LU150     | 0, 0, 0               | 0.00 ± 0.00 | NA   |
| P. acnes 2400      | L. rhamnosus SCN01   | 0.8, 0.7, 0.7         | 0.73 ± 0.06 | 0.08 |
| P. granulosum 2462 | B. bifidum BF030     | 0, 0, 0               | 0.00 ± 0.00 | NA   |
| P. granulosum 2462 | B. breve SCN03       | 0, 0, 0               | 0.00 ± 0.00 | NA   |
| P. granulosum 2462 | B. lactis BIO40      | 0, 0, 0               | 0.00 ± 0.00 | NA   |
| P. granulosum 2462 | B. longum BL020      | 0, 0, 0               | 0.00 ± 0.00 | NA   |
| P. granulosum 2462 | L. acidophilus LA120 | 0.3, 0.2, 0.3         | 0.27 ± 0.06 | 0.22 |
| P. granulosum 2462 | L. casei LC130       | 0.7, 0.9, 0.8         | 0.80 ± 0.10 | 0.12 |
| P. granulosum 2462 | L. fermentum LF160   | 0.5, 0.5, 0.5         | 0.50 ± 0.00 | 0.00 |
| P. granulosum 2462 | L. paracasei LPC100  | 0.9, 0.7, 0.9         | 0.83 ± 0.12 | 0.14 |
| P. granulosum 2462 | L. plantarum SCN02   | 0.8, 0.6, 0.9         | 0.77 ± 0.15 | 0.20 |
| P. granulosum 2462 | L. reuteri LU150     | 0.5, 0.8, 0.8         | 0.70 ± 0.17 | 0.25 |
| P. granulosum 2462 | L. rhamnosus SCN01   | 1, 1, 1               | 1.00 ± 0.00 | 0.00 |
| S. aureus 25923    | B. bifidum BF030     | 0, 0, 0               | 0.00 ± 0.00 | NA   |
| S. aureus 25923    | B. breve SCN03       | 0, 0, 0               | 0.00 ± 0.00 | NA   |
| S. aureus 25923    | B. lactis BIO40      | 0, 0, 0               | 0.00 ± 0.00 | NA   |
| S. aureus 25923    | B. longum BL020      | 0, 0, 0               | 0.00 ± 0.00 | NA   |
| S. aureus 25923    | L. acidophilus LA120 | 0, 0, 0               | 0.00 ± 0.00 | NA   |
| S. aureus 25923    | L. casei LC130       | 0.2, 0.3, 0.2         | 0.23 ± 0.06 | 0.25 |
| S. aureus 25923    | L. fermentum LF160   | 0.5, 0.5, 0.5         | 0.50 ± 0.00 | 0.00 |
| S. aureus 25923    | L. paracasei LPC100  | 0, 0, 0               | 0.00 ± 0.00 | NA   |
| S. aureus 25923    | L. plantarum SCN02   | 0, 0, 0               | 0.00 ± 0.00 | NA   |
| S. aureus 25923    | L. reuteri LU150     | 0, 0, 0               | 0.00 ± 0.00 | NA   |
| S. aureus 25923    | L. rhamnosus SCN01   | 1, 1, 0.9             | 0.97 ± 0.06 | 0.06 |
| S. aureus 29213    | B. bifidum BF030     | 0, 0, 0               | 0.00 ± 0.00 | NA   |
| S. aureus 29213    | B. breve SCN03       | 0, 0, 0               | 0.00 ± 0.00 | NA   |

| Indicator            | Producer             | Replicates (t1,t2,t3) | Mean ± SD   | CV   |
|----------------------|----------------------|-----------------------|-------------|------|
| S. aureus 29213      | B. lactis BIO40      | 0, 0, 0               | 0.00 ± 0.00 | NA   |
| S. aureus 29213      | B. longum BL020      | 0, 0, 0               | 0.00 ± 0.00 | NA   |
| S. aureus 29213      | L. acidophilus LA120 | 0, 0, 0               | 0.00 ± 0.00 | NA   |
| S. aureus 29213      | L. casei LC130       | 0, 0, 0               | 0.00 ± 0.00 | NA   |
| S. aureus 29213      | L. fermentum LF160   | 0.8, 0.8, 0.7         | 0.77 ± 0.06 | 0.08 |
| S. aureus 29213      | L. paracasei LPC100  | 0, 0, 0               | 0.00 ± 0.00 | NA   |
| S. aureus 29213      | L. plantarum SCN02   | 0, 0, 0               | 0.00 ± 0.00 | NA   |
| S. aureus 29213      | L. reuteri LU150     | 0, 0, 0               | 0.00 ± 0.00 | NA   |
| S. aureus 29213      | L. rhamnosus SCN01   | 1, 1, 0.9             | 0.97 ± 0.06 | 0.06 |
| S. aureus 6538       | B. bifidum BF030     | 0, 0, 0               | 0.00 ± 0.00 | NA   |
| S. aureus 6538       | B. breve SCN03       | 0, 0, 0               | 0.00 ± 0.00 | NA   |
| S. aureus 6538       | B. lactis BIO40      | 0.2, 0.1, 0.2         | 0.17 ± 0.06 | 0.35 |
| S. aureus 6538       | B. longum BL020      | 0, 0, 0               | 0.00 ± 0.00 | NA   |
| S. aureus 6538       | L. acidophilus LA120 | 0, 0, 0               | 0.00 ± 0.00 | NA   |
| S. aureus 6538       | L. casei LC130       | 0, 0, 0               | 0.00 ± 0.00 | NA   |
| S. aureus 6538       | L. fermentum LF160   | 0.8, 0.8, 0.7         | 0.77 ± 0.06 | 0.08 |
| S. aureus 6538       | L. paracasei LPC100  | 0, 0, 0               | 0.00 ± 0.00 | NA   |
| S. aureus 6538       | L. plantarum SCN02   | 0.3, 0.2, 0.3         | 0.27 ± 0.06 | 0.22 |
| S. aureus 6538       | L. reuteri LU150     | 0, 0, 0               | 0.00 ± 0.00 | NA   |
| S. aureus 6538       | L. rhamnosus SCN01   | 0.5, 0.5, 0.4         | 0.47 ± 0.06 | 0.12 |
| S. epidermidis 10.2  | B. bifidum BF030     | 0, 0, 0               | 0.00 ± 0.00 | NA   |
| S. epidermidis 10.2  | B. breve SCN03       | 0, 0, 0               | 0.00 ± 0.00 | NA   |
| S. epidermidis 10.2  | B. lactis BIO40      | 0, 0, 0               | 0.00 ± 0.00 | NA   |
| S. epidermidis 10.2  | B. longum BL020      | 0, 0, 0               | 0.00 ± 0.00 | NA   |
| S. epidermidis 10.2  | L. acidophilus LA120 | 0, 0, 0               | 0.00 ± 0.00 | NA   |
| S. epidermidis 10.2  | L. casei LC130       | 0, 0, 0               | 0.00 ± 0.00 | NA   |
| S. epidermidis 10.2  | L. fermentum LF160   | 0, 0, 0               | 0.00 ± 0.00 | NA   |
| S. epidermidis 10.2  | L. paracasei LPC100  | 0, 0, 0               | 0.00 ± 0.00 | NA   |
| S. epidermidis 10.2  | L. plantarum SCN02   | 0, 0, 0               | 0.00 ± 0.00 | NA   |
| S. epidermidis 10.2  | L. reuteri LU150     | 0, 0, 0               | 0.00 ± 0.00 | NA   |
| S. epidermidis 10.2  | L. rhamnosus SCN01   | 0, 0, 0               | 0.00 ± 0.00 | NA   |
| S. epidermidis 13.12 | B. bifidum BF030     | 0, 0, 0               | 0.00 ± 0.00 | NA   |
| S. epidermidis 13.12 | B. breve SCN03       | 0, 0, 0               | 0.00 ± 0.00 | NA   |
| S. epidermidis 13.12 | B. lactis BIO40      | 0, 0, 0               | 0.00 ± 0.00 | NA   |
| S. epidermidis 13.12 | B. longum BL020      | 0, 0, 0               | 0.00 ± 0.00 | NA   |
| S. epidermidis 13.12 | L. acidophilus LA120 | 0, 0, 0               | 0.00 ± 0.00 | NA   |
| S. epidermidis 13.12 | L. casei LC130       | 0, 0, 0               | 0.00 ± 0.00 | NA   |
| S. epidermidis 13.12 | L. fermentum LF160   | 0, 0, 0               | 0.00 ± 0.00 | NA   |
| S. epidermidis 13.12 | L. paracasei LPC100  | 0, 0, 0               | 0.00 ± 0.00 | NA   |
| S. epidermidis 13.12 | L. plantarum SCN02   | 0, 0, 0               | 0.00 ± 0.00 | NA   |
| S. epidermidis 13.12 | L. reuteri LU150     | 0, 0, 0               | 0.00 ± 0.00 | NA   |
| S. epidermidis 13.12 | L. rhamnosus SCN01   | 0, 0, 0               | 0.00 ± 0.00 | NA   |
| S. epidermidis 38.2  | B. bifidum BF030     | 0, 0, 0               | 0.00 ± 0.00 | NA   |
| S. epidermidis 38.2  | B. breve SCN03       | 0, 0, 0               | 0.00 ± 0.00 | NA   |
| S. epidermidis 38.2  | B. lactis BIO40      | 0, 0, 0               | 0.00 ± 0.00 | NA   |
| S. epidermidis 38.2  | B. longum BL020      | 0, 0, 0               | 0.00 ± 0.00 | NA   |
| S. epidermidis 38.2  | L. acidophilus LA120 | 0, 0, 0               | 0.00 ± 0.00 | NA   |
| S. epidermidis 38.2  | L. casei LC130       | 0, 0, 0               | 0.00 ± 0.00 | NA   |
| S. epidermidis 38.2  | L. fermentum LF160   | 0.2, 0.2, 0.1         | 0.17 ± 0.06 | 0.35 |
| S. epidermidis 38.2  | L. paracasei LPC100  | 0, 0, 0               | 0.00 ± 0.00 | NA   |
| S. epidermidis 38.2  | L. plantarum SCN02   | 0, 0, 0               | 0.00 ± 0.00 | NA   |
| S. epidermidis 38.2  | L. reuteri LU150     | 0, 0, 0               | 0.00 ± 0.00 | NA   |
| S. epidermidis 38.2  | L. rhamnosus SCN01   | 0, 0, 0               | 0.00 ± 0.00 | NA   |
| S. epidermidis 9.20  | B. bifidum BF030     | 0, 0, 0               | 0.00 ± 0.00 | NA   |
| S. epidermidis 9.20  | B. breve SCN03       | 0, 0, 0               | 0.00 ± 0.00 | NA   |
| S. epidermidis 9.20  | B. lactis BIO40      | 0, 0, 0               | 0.00 ± 0.00 | NA   |
| S. epidermidis 9.20  | B. longum BL020      | 0, 0, 0               | 0.00 ± 0.00 | NA   |
| S. epidermidis 9.20  | L. acidophilus LA120 | 0, 0, 0               | 0.00 ± 0.00 | NA   |
| S. epidermidis 9.20  | L. casei LC130       | 0, 0, 0               | 0.00 ± 0.00 | NA   |
| S. epidermidis 9.20  | L. fermentum LF160   | 0, 0, 0               | 0.00 ± 0.00 | NA   |
| S. epidermidis 9.20  | L. paracasei LPC100  | 0, 0, 0               | 0.00 ± 0.00 | NA   |
| S. epidermidis 9.20  | L. plantarum SCN02   | 0, 0, 0               | 0.00 ± 0.00 | NA   |
| S. epidermidis 9.20  | L. reuteri LU150     | 0, 0, 0               | 0.00 ± 0.00 | NA   |
| S. epidermidis 9.20  | L. rhamnosus SCN01   | 0, 0, 0               | 0.00 ± 0.00 | NA   |



| Metabolite       | Class               | MSR (control. no strain. medium only) | <i>B. bifidum</i> BF030 | <i>B. breve</i> SCN03 | <i>B. lactis</i> BI040 | <i>B. longum</i> BL020 | <i>L. acidophilus</i> LA120 | <i>L. casei</i> LC130 | <i>L. fermentum</i> LF160 | <i>L. paracasei</i> LPC100 | <i>L. plantarum</i> SCN02 | <i>L. reuteri</i> LU150 | <i>L. rhamnosus</i> SCN01 |
|------------------|---------------------|---------------------------------------|-------------------------|-----------------------|------------------------|------------------------|-----------------------------|-----------------------|---------------------------|----------------------------|---------------------------|-------------------------|---------------------------|
| FA 18:1          | Fatty Acids         | < LOD                                 | < LOD                   | < LOD                 | < LOD                  | < LOD                  | < LOD                       | < LOD                 | < LOD                     | < LOD                      | < LOD                     | < LOD                   | < LOD                     |
| FA 18:2          | Fatty Acids         | < LOD                                 | < LOD                   | < LOD                 | < LOD                  | < LOD                  | < LOD                       | < LOD                 | < LOD                     | < LOD                      | < LOD                     | < LOD                   | < LOD                     |
| FA 20:1          | Fatty Acids         | < LOD                                 | < LOD                   | < LOD                 | < LOD                  | < LOD                  | < LOD                       | < LOD                 | < LOD                     | < LOD                      | < LOD                     | < LOD                   | < LOD                     |
| FA 20:2          | Fatty Acids         | < LOD                                 | < LOD                   | < LOD                 | < LOD                  | < LOD                  | < LOD                       | < LOD                 | < LOD                     | < LOD                      | < LOD                     | < LOD                   | < LOD                     |
| FA 20:3          | Fatty Acids         | < LOD                                 | < LOD                   | 2.1                   | 1.43                   | < LOD                  | < LOD                       | < LOD                 | 2.76                      | < LOD                      | < LOD                     | 1.95                    | < LOD                     |
| FA 20:4n-6 (AA)  | Fatty Acids         | < LOD                                 | < LOD                   | < LOD                 | < LOD                  | < LOD                  | < LOD                       | < LOD                 | < LOD                     | < LOD                      | < LOD                     | < LOD                   | < LOD                     |
| FA 20:5n-3 (EPA) | Fatty Acids         | < LOD                                 | < LOD                   | < LOD                 | < LOD                  | < LOD                  | < LOD                       | < LOD                 | < LOD                     | < LOD                      | < LOD                     | < LOD                   | < LOD                     |
| FA 22:6n-3 (DHA) | Fatty Acids         | < LOD                                 | < LOD                   | < LOD                 | < LOD                  | < LOD                  | < LOD                       | < LOD                 | < LOD                     | < LOD                      | < LOD                     | < LOD                   | < LOD                     |
| GABA             | Biogenic Amines     | 59.7                                  | 59.6                    | 60.2                  | 51.2                   | 62                     | 60.5                        | 61.3                  | 55.6                      | 59                         | 151                       | 56.6                    | 71                        |
| GCA              | Bile Acids          | 0.004                                 | 0.003                   | 0.001                 | < LOD                  | 0.002                  | 0.005                       | 0.003                 | 0.006                     | 0.004                      | 0.002                     | 0.002                   | 0.003                     |
| GCDCA            | Bile Acids          | < LOD                                 | 0                       | < LOD                 | < LOD                  | < LOD                  | < LOD                       | < LOD                 | < LOD                     | < LOD                      | < LOD                     | < LOD                   | < LOD                     |
| GDCA             | Bile Acids          | < LOD                                 | 0                       | 0                     | 0                      | < LOD                  | 0                           | 0                     | < LOD                     | < LOD                      | < LOD                     | < LOD                   | < LOD                     |
| GLCA             | Bile Acids          | < LOD                                 | < LOD                   | < LOD                 | < LOD                  | < LOD                  | < LOD                       | < LOD                 | < LOD                     | < LOD                      | < LOD                     | < LOD                   | < LOD                     |
| GLCAS            | Bile Acids          | < LOD                                 | 0.001                   | < LOD                 | < LOD                  | < LOD                  | < LOD                       | < LOD                 | < LOD                     | < LOD                      | < LOD                     | < LOD                   | < LOD                     |
| GUDCA            | Bile Acids          | < LOD                                 | < LOD                   | < LOD                 | < LOD                  | 0.001                  | < LOD                       | < LOD                 | < LOD                     | < LOD                      | < LOD                     | < LOD                   | < LOD                     |
| Gln              | Aminoacids          | 7.09                                  | 131                     | 606                   | 238                    | 959                    | 152                         | 6.03                  | 382                       | 9.41                       | 31.8                      | 34.1                    | 6.78                      |
| Glu              | Aminoacids          | 2500                                  | 2458                    | 2819                  | 2802                   | 3274                   | 2293                        | 2632                  | 1557                      | 1996                       | 1521                      | 2170                    | 2487                      |
| Gly              | Aminoacids          | 5129                                  | 6459                    | 7003                  | 7448                   | 6522                   | 5689                        | 8189                  | 6186                      | 5532                       | 5583                      | 6127                    | 6982                      |
| HArg             | Aminoacids Related  | 0.254                                 | 0.223                   | 0.213                 | 0.274                  | 0.221                  | 0.192                       | 0.32                  | 0.523                     | 0.263                      | 0.62                      | 0.671                   | 0.313                     |
| HipAcid          | Carboxylic Acids    | < LOD                                 | < LOD                   | < LOD                 | < LOD                  | < LOD                  | < LOD                       | < LOD                 | < LOD                     | < LOD                      | < LOD                     | < LOD                   | < LOD                     |
| His              | Aminoacids          | 159                                   | 197                     | 238                   | 226                    | 227                    | 168                         | 216                   | 142                       | 126                        | 130                       | 2.5                     | 181                       |
| Histamine        | Biogenic Amines     | 0.69                                  | 0.608                   | 0.494                 | 0.561                  | 0.543                  | 0.976                       | 0.251                 | 0.52                      | 0.72                       | 0.504                     | 177                     | 0.764                     |
| Hypoxanthine     | Nucleobases Related | 7.9                                   | 45.1                    | 13.5                  | 32.3                   | 10.4                   | 26.6                        | 32.1                  | < LOD                     | 14.3                       | < LOD                     | 5.06                    | 35.8                      |
| Ile              | Aminoacids          | 763                                   | 917                     | 987                   | 1059                   | 866                    | 912                         | 1218                  | 768                       | 770                        | 680                       | 792                     | 1083                      |
| Ind-SO4          | Indoles Derivatives | 0.014                                 | 0.017                   | 0.012                 | 0.018                  | 0.016                  | 0.019                       | < LOD                 | 0.013                     | 0.012                      | 0.025                     | 0.012                   | 0.018                     |
| Indole           | Indoles Derivatives | < LOD                                 | < LOD                   | < LOD                 | < LOD                  | < LOD                  | < LOD                       | < LOD                 | < LOD                     | < LOD                      | < LOD                     | < LOD                   | < LOD                     |
| Kynurenine       | Aminoacids Related  | < LOD                                 | 0.195                   | < LOD                 | < LOD                  | < LOD                  | < LOD                       | 0.325                 | < LOD                     | 0.163                      | < LOD                     | < LOD                   | 0.035                     |
| Lac              | Carboxylic Acids    | 3234                                  | 48513                   | 21620                 | 20162                  | 40423                  | 17610                       | 118597                | 70895                     | 88540                      | 143233                    | 64565                   | 88144                     |
| Leu              | Aminoacids          | 1949                                  | 1831                    | 1909                  | 2120                   | 1793                   | 1939                        | 2196                  | 1479                      | 1684                       | 1451                      | 1435                    | 1973                      |
| Lys              | Aminoacids          | 468                                   | 792                     | 608                   | 545                    | 771                    | 545                         | 445                   | 453                       | 284                        | 361                       | 262                     | 524                       |
| Met              | Aminoacids          | 163                                   | 339                     | 271                   | 374                    | 266                    | 1.65                        | 356                   | 174                       | 3.07                       | 188                       | 148                     | 188                       |
| Nitro-Tyr        | Aminoacids Related  | < LOD                                 | < LOD                   | < LOD                 | < LOD                  | < LOD                  | < LOD                       | < LOD                 | < LOD                     | < LOD                      | < LOD                     | < LOD                   | < LOD                     |
| OH-GlutAcid      | Carboxylic Acids    | 85.4                                  | 25.4                    | 26.1                  | 37.5                   | 103                    | 17                          | 326                   | 28.2                      | 168                        | 57.2                      | 82.3                    | 89.4                      |
| Orn              | Aminoacids Related  | 27.5                                  | 72.5                    | 39.1                  | 23.2                   | 55.3                   | 50.5                        | 11.9                  | 714                       | 21                         | 41.9                      | 662                     | 27.1                      |
| PAG              | Aminoacids Related  | < LOD                                 | < LOD                   | < LOD                 | < LOD                  | < LOD                  | < LOD                       | < LOD                 | < LOD                     | < LOD                      | < LOD                     | < LOD                   | < LOD                     |
| PEA              | Biogenic Amines     | 1.09                                  | 0.432                   | 0.484                 | 0.489                  | 0.517                  | 1.37                        | 0.468                 | 0.472                     | 1.25                       | 0.43                      | 0.481                   | 1.23                      |
| Phe              | Aminoacids          | 745                                   | 842                     | 861                   | 927                    | 675                    | 801                         | 856                   | 532                       | 744                        | 391                       | 446                     | 936                       |
| PheAlaBetaine    | Aminoacids Related  | < LOD                                 | < LOD                   | < LOD                 | < LOD                  | < LOD                  | < LOD                       | < LOD                 | < LOD                     | < LOD                      | < LOD                     | < LOD                   | < LOD                     |
| Pro              | Aminoacids          | 457                                   | 528                     | 600                   | 958                    | 696                    | 556                         | 1322                  | 406                       | 802                        | 601                       | 810                     | 888                       |

| Metabolite   | Class               | MSR (control. no strain. medium only) | <i>B. bifidum</i> BF030 | <i>B. breve</i> SCN03 | <i>B. lactis</i> BI040 | <i>B. longum</i> BL020 | <i>L. acidophilus</i> LA120 | <i>L. casei</i> LC130 | <i>L. fermentum</i> LF160 | <i>L. paracasei</i> LPC100 | <i>L. plantarum</i> SCN02 | <i>L. reuteri</i> LU150 | <i>L. rhamnosus</i> SCN01 |
|--------------|---------------------|---------------------------------------|-------------------------|-----------------------|------------------------|------------------------|-----------------------------|-----------------------|---------------------------|----------------------------|---------------------------|-------------------------|---------------------------|
| ProBetaine   | Aminoacids Related  | 0.549                                 | 0.735                   | 0.646                 | 0.77                   | 0.743                  | 0.859                       | 0.717                 | 0.732                     | 0.811                      | 0.811                     | 0.659                   | 0.802                     |
| Putrescine   | Biogenic Amines     | 2.09                                  | 3.84                    | 2.45                  | 2.55                   | 3.49                   | 3.01                        | 2.85                  | 2.76                      | 2.13                       | 3.17                      | 2.04                    | 3.22                      |
| SDMA         | Aminoacids Related  | 2.15                                  | 4.01                    | 6.22                  | 3.57                   | 2.9                    | 3.41                        | 8.55                  | 5.59                      | 7.5                        | 10.7                      | 2.79                    | 8.06                      |
| Sarcosine    | Aminoacids Related  | 6.66                                  | 6.44                    | 6.26                  | 6                      | 6.63                   | 7.47                        | 6.46                  | 6.3                       | 7.41                       | 6.58                      | 6.3                     | 8.46                      |
| Ser          | Aminoacids          | 945                                   | 961                     | 1112                  | 1256                   | 1145                   | 1157                        | 1252                  | 833                       | 855                        | 522                       | 908                     | 1154                      |
| Serotonin    | Biogenic Amines     | < LOD                                 | < LOD                   | < LOD                 | < LOD                  | < LOD                  | < LOD                       | < LOD                 | < LOD                     | < LOD                      | < LOD                     | < LOD                   | < LOD                     |
| Spermidine   | Biogenic Amines     | 4.22                                  | 9.98                    | 6.03                  | 5.1                    | 8.2                    | 3.28                        | 1.77                  | 7.68                      | < LOD                      | 0.792                     | 0.682                   | < LOD                     |
| Spermine     | Biogenic Amines     | 0.62                                  | 2                       | 0.738                 | 0.53                   | 1.22                   | 0.617                       | 0.504                 | 1.39                      | < LOD                      | 1.12                      | 0.412                   | < LOD                     |
| Suc          | Carboxylic Acids    | 501                                   | 696                     | 683                   | 642                    | 1310                   | 772                         | 932                   | 14466                     | 792                        | 2091                      | 5533                    | 921                       |
| TCA          | Bile Acids          | 0.006                                 | 0                       | 0.001                 | 0.002                  | 0.002                  | 0.006                       | 0.003                 | 0.006                     | 0.005                      | 0.004                     | 0.002                   | 0.003                     |
| TCDCa        | Bile Acids          | < LOD                                 | < LOD                   | 0.005                 | < LOD                  | < LOD                  | < LOD                       | < LOD                 | < LOD                     | < LOD                      | < LOD                     | < LOD                   | < LOD                     |
| TDCA         | Bile Acids          | < LOD                                 | < LOD                   | < LOD                 | < LOD                  | < LOD                  | < LOD                       | < LOD                 | < LOD                     | < LOD                      | < LOD                     | < LOD                   | < LOD                     |
| TLCA         | Bile Acids          | < LOD                                 | 0                       | < LOD                 | < LOD                  | < LOD                  | < LOD                       | < LOD                 | < LOD                     | < LOD                      | < LOD                     | < LOD                   | < LOD                     |
| TMAO         | Amine Oxides        | < LOD                                 | < LOD                   | < LOD                 | < LOD                  | < LOD                  | < LOD                       | < LOD                 | < LOD                     | < LOD                      | < LOD                     | < LOD                   | < LOD                     |
| TMCA         | Bile Acids          | 0.004                                 | < LOD                   | 0.003                 | < LOD                  | < LOD                  | < LOD                       | < LOD                 | 0.003                     | < LOD                      | 0.005                     | 0.003                   | < LOD                     |
| Taurine      | Aminoacids Related  | 26.1                                  | 25.5                    | 27                    | 27.9                   | 24.8                   | 26.4                        | 26.3                  | 24.8                      | 22.7                       | 23.6                      | 24.3                    | 27.1                      |
| Thr          | Aminoacids          | 850                                   | 1034                    | 1079                  | 1250                   | 1063                   | 923                         | 1201                  | 753                       | 817                        | 671                       | 878                     | 968                       |
| Trigonelline | Alkaloids           | 0.846                                 | 1.07                    | 0.882                 | 1.02                   | 1.01                   | 1.08                        | 0.963                 | 0.969                     | 1.06                       | 1                         | 0.785                   | 1.26                      |
| Trp          | Aminoacids          | 154                                   | 183                     | 153                   | 173                    | 118                    | 120                         | 168                   | 138                       | 90.9                       | 90.9                      | 114                     | 147                       |
| TrpBetaine   | Aminoacids Related  | < LOD                                 | < LOD                   | < LOD                 | < LOD                  | < LOD                  | < LOD                       | < LOD                 | < LOD                     | < LOD                      | < LOD                     | < LOD                   | < LOD                     |
| Tyr          | Aminoacids          | 250                                   | 322                     | 301                   | 418                    | 272                    | 263                         | 303                   | 148                       | 215                        | 71                        | 139                     | 290                       |
| Val          | Aminoacids          | 1092                                  | 1505                    | 1411                  | 1948                   | 1407                   | 1295                        | 2076                  | 1194                      | 1362                       | 1269                      | 1518                    | 1762                      |
| Xanthine     | Nucleobases Related | 13.8                                  | 20                      | < LOD                 | 15.9                   | < LOD                  | 26.1                        | < LOD                 | < LOD                     | < LOD                      | < LOD                     | < LOD                   | 5.85                      |
| alpha-AAA    | Aminoacids Related  | 1.98                                  | 2.24                    | 2.54                  | 2.43                   | 3.5                    | 2.74                        | 3.61                  | 2.67                      | 1.74                       | 3.8                       | 3.07                    | 1.68                      |
| beta-Ala     | Biogenic Amines     | 5.27                                  | 5.42                    | 4.79                  | 4.96                   | 5.04                   | 5.63                        | 5.09                  | 4.22                      | 4.5                        | 2.71                      | 4.61                    | 5.81                      |
| c4-OH-Pro    | Aminoacids Related  | 32.7                                  | 28.8                    | 28.4                  | 30.2                   | 31.4                   | 31.8                        | 27.7                  | 27.1                      | 31.5                       | 28.7                      | 28.8                    | 38.4                      |
| p-Cresol-SO4 | Cresols             | 0.494                                 | 0.372                   | 0.405                 | 0.409                  | 0.344                  | 0.44                        | 0.281                 | 0.404                     | 0.347                      | 0.256                     | 0.323                   | 0.391                     |
| t4-OH-Pro    | Aminoacids Related  | 76.7                                  | 73                      | 96.6                  | 109                    | 99.1                   | 86.6                        | 153                   | 77.7                      | 110                        | 69.1                      | 81                      | 140                       |

22  
23  
24  
25  
26

**Table S3. TEER time course and Dunnett-adjusted multiple comparisons versus matched control after exposure of Caco-2 monolayers to live bacterial strains.**  
(A) TEER values were exported from CellZscope, normalized for each insert to its post-stabilization baseline (t = 0; 100%), and reported as % of baseline; the first 6 h of recording were omitted due to instrument stabilization. (B) Statistical inference was performed in GraphPad Prism (v10.6.1) using a mixed-effects model (REML) with Geisser - Greenhouse correction, followed by Dunnett's multiple comparisons test versus the matched control at each time point (Dunnett p<sub>adj</sub> values reported).  
**Table S3A\_summary (mean ± SD and n)**

| Time_h | L. acidophilus LA120 mean | L. acidophilus LA120 SD | L. acidophilus LA120 n | L. fermentum LF160 mean | L. fermentum LF160 SD | L. fermentum LF160 n | L. paracasei LPC100 mean | L. paracasei LPC100 SD | L. paracasei LPC100 n | L. plantarum SCN02 mean | L. plantarum SCN02 SD | L. plantarum SCN02 n | L. rhamnosus SCN01 mean | L. rhamnosus SCN01 SD | L. rhamnosus SCN01 n | Control Lactobacillus mean | Control Lactobacillus SD | Control Lactobacillus n | B. bifidum BF030 mean | B. bifidum BF030 SD | B. bifidum BF030 n | B. breve SCN03 mean | B. breve SCN03 SD | B. breve SCN03 n | Control Bifidobacterium | Control Bifidobacterium SD | Control Bifidobacterium n |
|--------|---------------------------|-------------------------|------------------------|-------------------------|-----------------------|----------------------|--------------------------|------------------------|-----------------------|-------------------------|-----------------------|----------------------|-------------------------|-----------------------|----------------------|----------------------------|--------------------------|-------------------------|-----------------------|---------------------|--------------------|---------------------|-------------------|------------------|-------------------------|----------------------------|---------------------------|
| 0.0    | 100.0                     | 0.0                     | 2.0                    | 100.0                   | 0.0                   | 3.0                  | 100.0                    | 0.0                    | 2.0                   | 100.0                   | 0.0                   | 3.0                  | 100.0                   | 0.0                   | 3.0                  | 100.0                      | 0.0                      | 3.0                     | 100.0                 | 0.0                 | 2.0                | 100.0               | 0.0               | 2.0              | 100.0                   | 0.0                        | 2.0                       |
| 3.0    | 93.32                     | 0.28                    | 2.0                    | 95.9                    | 4.8                   | 3.0                  | 92.92                    | 5.77                   | 2.0                   | 92.5                    | 2.05                  | 3.0                  | 103.15                  | 2.77                  | 3.0                  | 93.48                      | 3.24                     | 3.0                     | 98.96                 | 0.43                | 2.0                | 98.14               | 4.31              | 2.0              | 95.23                   | 0.69                       | 2.0                       |
| 6.0    | 93.68                     | 1.04                    | 2.0                    | 95.29                   | 5.06                  | 3.0                  | 91.85                    | 7.68                   | 2.0                   | 91.58                   | 2.86                  | 3.0                  | 115.18                  | 4.77                  | 3.0                  | 92.66                      | 5.48                     | 3.0                     | 100.28                | 4.6                 | 2.0                | 100.34              | 5.61              | 2.0              | 95.36                   | 1.8                        | 2.0                       |
| 9.0    | 96.05                     | 0.28                    | 2.0                    | 97.76                   | 5.14                  | 3.0                  | 94.06                    | 7.85                   | 2.0                   | 93.36                   | 2.09                  | 3.0                  | 128.36                  | 8.88                  | 3.0                  | 93.08                      | 5.98                     | 3.0                     | 103.55                | 5.97                | 2.0                | 103.93              | 4.08              | 2.0              | 97.56                   | 4.6                        | 2.0                       |
| 12.0   | 98.0                      | 2.0                     | 2.0                    | 101.4                   | 6.6                   | 3.0                  | 98.15                    | 6.88                   | 2.0                   | 96.39                   | 3.25                  | 3.0                  | 138.56                  | 11.66                 | 3.0                  | 94.13                      | 5.57                     | 3.0                     | 108.66                | 8.21                | 2.0                | 109.46              | 1.17              | 2.0              | 103.81                  | 4.81                       | 2.0                       |
| 15.0   | 101.82                    | 2.47                    | 2.0                    | 106.73                  | 7.61                  | 3.0                  | 102.57                   | 4.31                   | 2.0                   | 99.98                   | 4.54                  | 3.0                  | 147.77                  | 14.88                 | 3.0                  | 97.4                       | 6.2                      | 3.0                     | 116.3                 | 9.33                | 2.0                | 116.9               | 5.38              | 2.0              | 111.69                  | 7.17                       | 2.0                       |
| 18.0   | 104.23                    | 4.68                    | 2.0                    | 112.1                   | 10.54                 | 3.0                  | 107.39                   | 0.6                    | 2.0                   | 105.11                  | 7.34                  | 3.0                  | 157.79                  | 20.55                 | 3.0                  | 99.57                      | 8.73                     | 3.0                     | 123.23                | 10.01               | 2.0                | 124.48              | 10.71             | 2.0              | 120.04                  | 7.33                       | 2.0                       |
| 21.0   | 106.75                    | 4.94                    | 2.0                    | 116.0                   | 11.92                 | 3.0                  | 111.65                   | 0.94                   | 2.0                   | 109.84                  | 9.57                  | 3.0                  | 163.42                  | 23.36                 | 3.0                  | 101.34                     | 11.29                    | 3.0                     | 127.2                 | 13.49               | 2.0                | 129.24              | 16.72             | 2.0              | 127.89                  | 10.72                      | 2.0                       |
| 24.0   | 108.2                     | 5.57                    | 2.0                    | 119.89                  | 13.35                 | 3.0                  | 115.89                   | 3.34                   | 2.0                   | 112.68                  | 12.47                 | 3.0                  | 172.36                  | 28.57                 | 3.0                  | 103.36                     | 12.17                    | 3.0                     | 135.07                | 13.5                | 2.0                | 135.51              | 19.64             | 2.0              | 137.13                  | 10.72                      | 2.0                       |
| 27.0   | 110.74                    | 6.12                    | 2.0                    | 124.17                  | 14.89                 | 3.0                  | 119.77                   | 7.41                   | 2.0                   | 117.58                  | 13.42                 | 3.0                  | 182.4                   | 34.94                 | 3.0                  | 103.87                     | 13.54                    | 3.0                     | 139.62                | 17.75               | 2.0                | 141.2               | 21.96             | 2.0              | 144.97                  | 14.38                      | 2.0                       |
| 30.0   | 113.2                     | 5.75                    | 2.0                    | 127.9                   | 17.37                 | 3.0                  | 124.82                   | 10.66                  | 2.0                   | 121.85                  | 16.75                 | 3.0                  | 189.9                   | 40.15                 | 3.0                  | 106.5                      | 14.09                    | 3.0                     | 148.46                | 16.8                | 2.0                | 149.11              | 27.39             | 2.0              | 151.68                  | 20.1                       | 2.0                       |
| 33.0   | 114.16                    | 7.1                     | 2.0                    | 131.22                  | 18.86                 | 3.0                  | 128.63                   | 14.17                  | 2.0                   | 125.87                  | 19.0                  | 3.0                  | 197.01                  | 45.89                 | 3.0                  | 107.25                     | 13.98                    | 3.0                     | 155.18                | 18.82               | 2.0                | 154.05              | 35.45             | 2.0              | 159.48                  | 20.61                      | 2.0                       |
| 35.0   | 116.52                    | 6.63                    | 2.0                    | 132.92                  | 19.2                  | 3.0                  | 131.86                   | 15.12                  | 2.0                   | 129.29                  | 21.58                 | 3.0                  | 199.99                  | 47.81                 | 3.0                  | 108.07                     | 13.56                    | 3.0                     | 156.97                | 25.3                | 2.0                | 157.76              | 39.49             | 2.0              | 162.95                  | 22.84                      | 2.0                       |

27

**Table S3B\_stats (mean difference vs matched control and Dunnett-adjusted p)**

| Time_h | L. acidophilus LA120 mean_diff | L. acidophilus LA120 p_adj | L. fermentum LF160 mean_diff | L. fermentum LF160 p_adj | L. paracasei LPC100 mean_diff | L. paracasei LPC100 p_adj | L. plantarum SCN02 mean_diff | L. plantarum SCN02 p_adj | L. rhamnosus SCN01 mean_diff | L. rhamnosus SCN01 p_adj | B. bifidum BF030 mean_diff | B. bifidum BF030 p_adj | B. breve SCN03 mean_diff | B. breve SCN03 p_adj |
|--------|--------------------------------|----------------------------|------------------------------|--------------------------|-------------------------------|---------------------------|------------------------------|--------------------------|------------------------------|--------------------------|----------------------------|------------------------|--------------------------|----------------------|
| 0.0    | 0.0                            |                            | 0.0                          |                          | 0.0                           |                           | 0.0                          |                          | 0.0                          |                          | 0.0                        |                        | 0.0                      |                      |
| 3.0    | 0.16                           | >0.9999                    | -2.42                        | 0.9132                   | 0.56                          | >0.9999                   | 0.98                         | 0.985                    | -9.67                        | 0.056                    | -3.74                      | 0.0528                 | -2.91                    | 0.6672               |
| 6.0    | -1.02                          | 0.9957                     | -2.63                        | 0.952                    | 0.81                          | >0.9999                   | 1.08                         | 0.997                    | -22.52                       | 0.0198                   | -4.92                      | 0.4844                 | -4.99                    | 0.5604               |
| 9.0    | -2.97                          | 0.8537                     | -4.67                        | 0.7729                   | -0.98                         | 0.9998                    | -0.28                        | >0.9999                  | -35.28                       | 0.0214                   | -5.98                      | 0.5433                 | -6.36                    | 0.4126               |
| 12.0   | -3.88                          | 0.7379                     | -7.28                        | 0.5443                   | -4.02                         | 0.9184                    | -2.26                        | 0.9506                   | -44.43                       | 0.0308                   | -4.86                      | 0.7405                 | -5.66                    | 0.4521               |
| 15.0   | -4.41                          | 0.7347                     | -9.32                        | 0.4592                   | -5.17                         | 0.7384                    | -2.57                        | 0.9593                   | -50.37                       | 0.0459                   | -4.61                      | 0.8223                 | -5.2                     | 0.6845               |
| 18.0   | -4.66                          | 0.8919                     | -12.53                       | 0.4848                   | -7.82                         | 0.556                     | -5.54                        | 0.865                    | -58.22                       | 0.07                     | -3.2                       | 0.913                  | -4.45                    | 0.8576               |
| 21.0   | -5.41                          | 0.9081                     | -14.66                       | 0.501                    | -10.31                        | 0.5451                    | -8.5                         | 0.7893                   | -62.08                       | 0.0775                   | 0.69                       | 0.9976                 | -1.36                    | 0.9932               |
| 24.0   | -4.84                          | 0.9513                     | -16.53                       | 0.4835                   | -12.53                        | 0.4853                    | -9.32                        | 0.8243                   | -69.0                        | 0.1015                   | 2.06                       | 0.9796                 | 1.62                     | 0.9924               |
| 27.0   | -6.87                          | 0.8934                     | -20.31                       | 0.4139                   | -15.9                         | 0.4636                    | -13.71                       | 0.6539                   | -78.54                       | 0.1221                   | 5.35                       | 0.9265                 | 3.77                     | 0.9708               |
| 30.0   | -6.7                           | 0.9055                     | -21.4                        | 0.4541                   | -18.32                        | 0.4853                    | -15.35                       | 0.6713                   | -83.4                        | 0.1472                   | 3.22                       | 0.9783                 | 2.58                     | 0.9916               |
| 33.0   | -6.91                          | 0.9102                     | -23.97                       | 0.4126                   | -21.38                        | 0.5033                    | -18.62                       | 0.5935                   | -89.76                       | 0.1696                   | 4.29                       | 0.9667                 | 5.43                     | 0.9751               |
| 35.0   | -8.45                          | 0.8236                     | -24.84                       | 0.3914                   | -23.79                        | 0.4676                    | -21.22                       | 0.5614                   | -91.91                       | 0.1769                   | 5.98                       | 0.9571                 | 5.18                     | 0.9815               |

28 **Figure S1. Net metabolite changes in cell-free spent MRS media relative to run-matched uninoculated controls (targeted LC-MS/MS; n = 3 independent**  
 29 **biological runs).** Panels show (A) B vitamins, (B) organic acids (“SCFA” panel; including lactate, selected branched-chain fatty acids (BCFAs) and C6 acids), (C)  
 30 polyamines/biogenic amines and related metabolites, and (D) amino acids and related compounds. Values are plotted as baseline-corrected net changes ( $\Delta$ ) in native  
 31 concentration units (nM for vitamins/selected analytes;  $\mu$ M for organic acids and amino acids). Boxplots summarize distributions across runs (median, IQR), with  
 32 individual run values overlaid (tests 1–3); dashed line denotes  $\Delta = 0$ . Asterisks indicate BH-adjusted significance for a two-sided one-sample test versus 0 within each  
 33 analyte (\* $p_{adj} < 0.05$ ; \*\* $p_{adj} < 0.01$ ; \*\*\* $p_{adj} < 0.001$ ). See Methods for data processing and baseline correction.

34  
 35  
 36

(A)

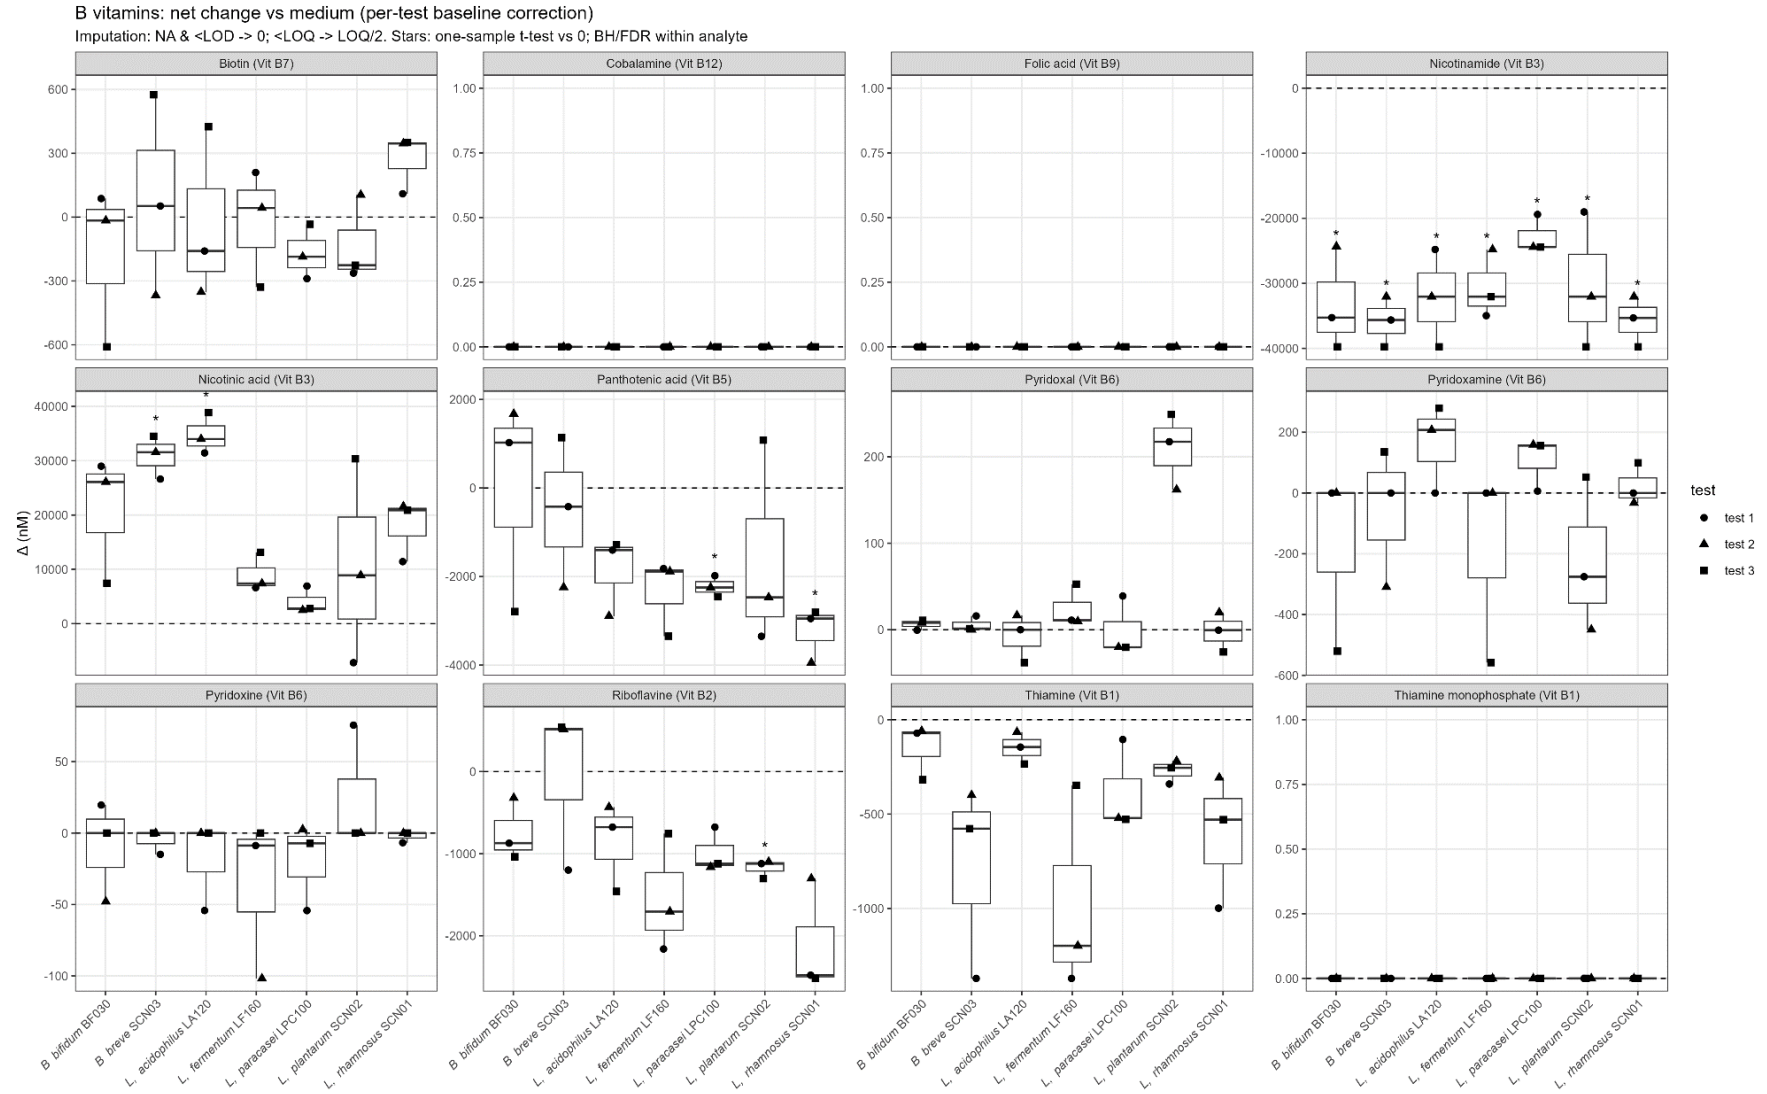

SCFAs: net change vs medium (per-test baseline correction)

Stars: one-sample t-test vs 0; BH/FDR within each metabolite

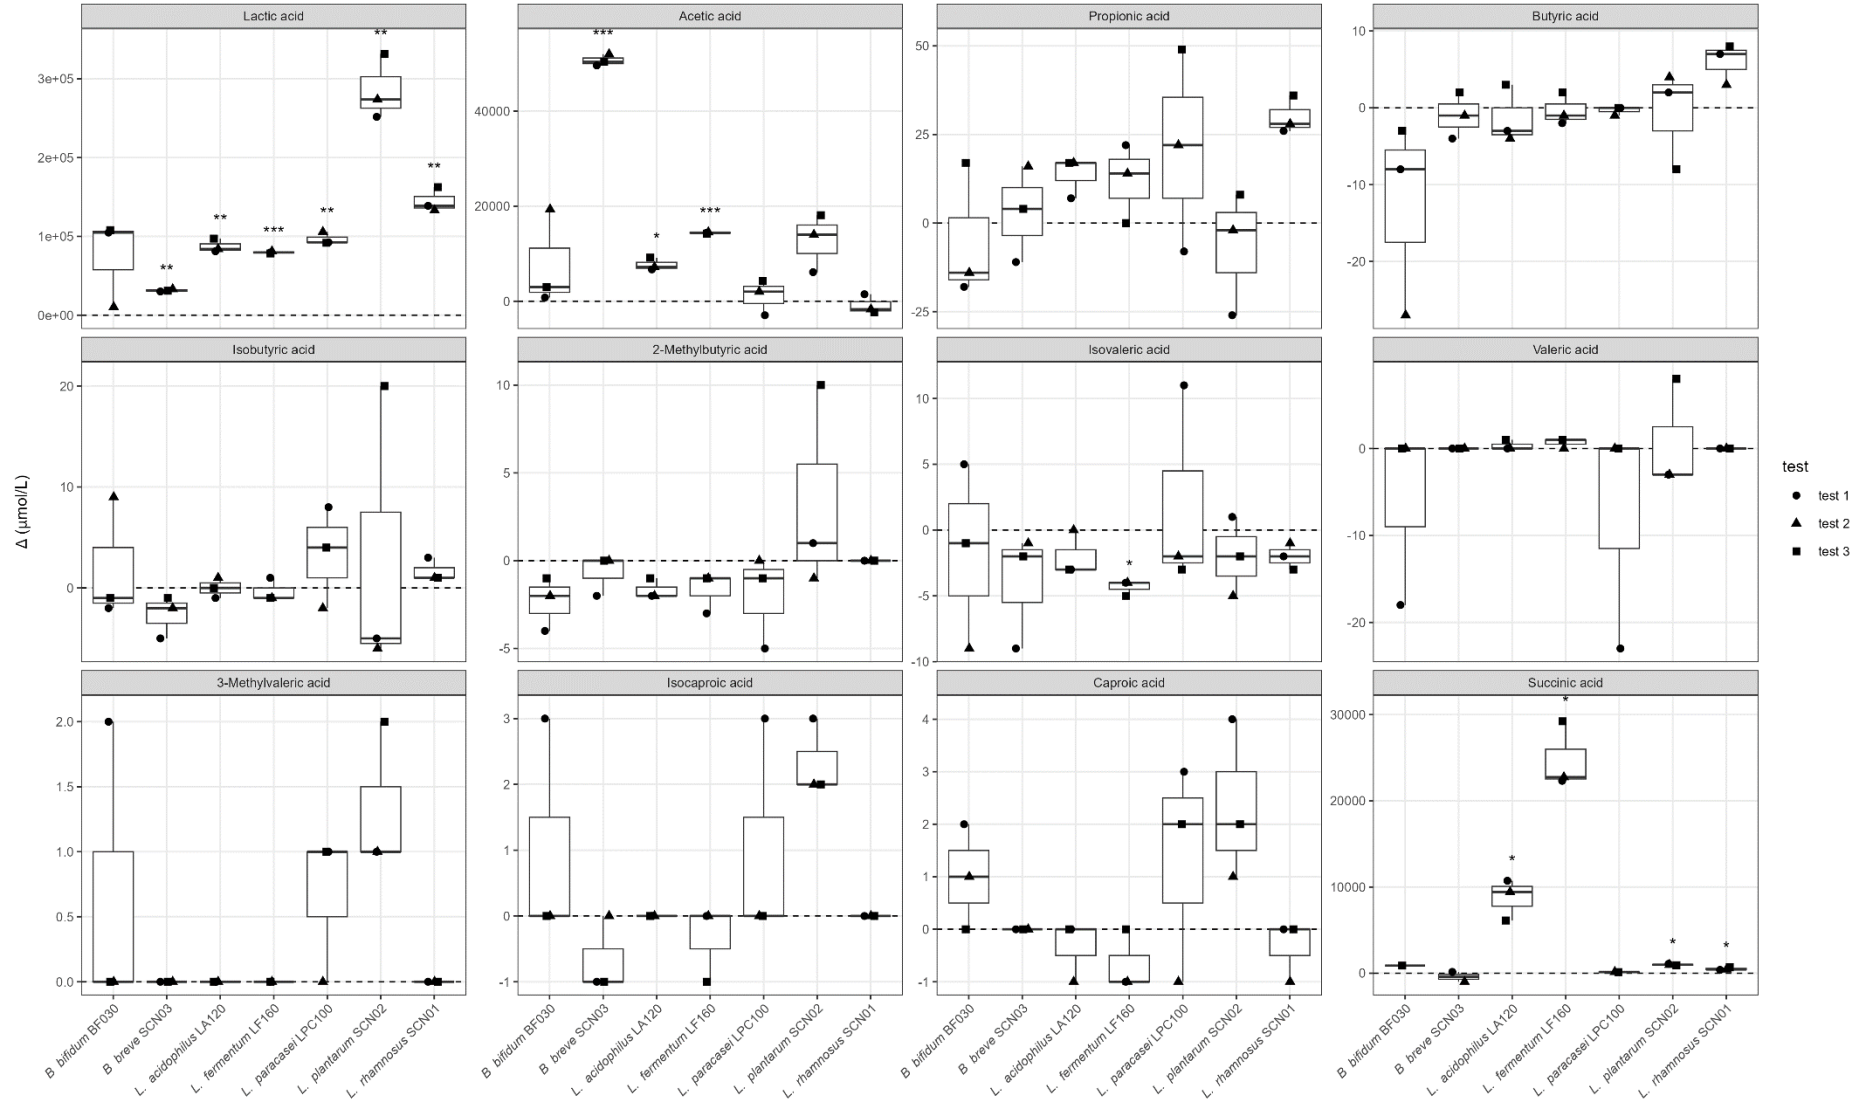

## Polyamines, Biogenic Amines, and Other Nitrogen-Containing Metabolites

All raw tests used for per-test correction (sample TESTx - MSR TESTx). Then, per strain, the 3 raw tests are relabeled as test 1–3. BLANK=missing; NA/<LOD=0; <LOQ=LOQ/2 when possible (else 0). Stars: t-test vs 0; BH/FDR within metabolite.

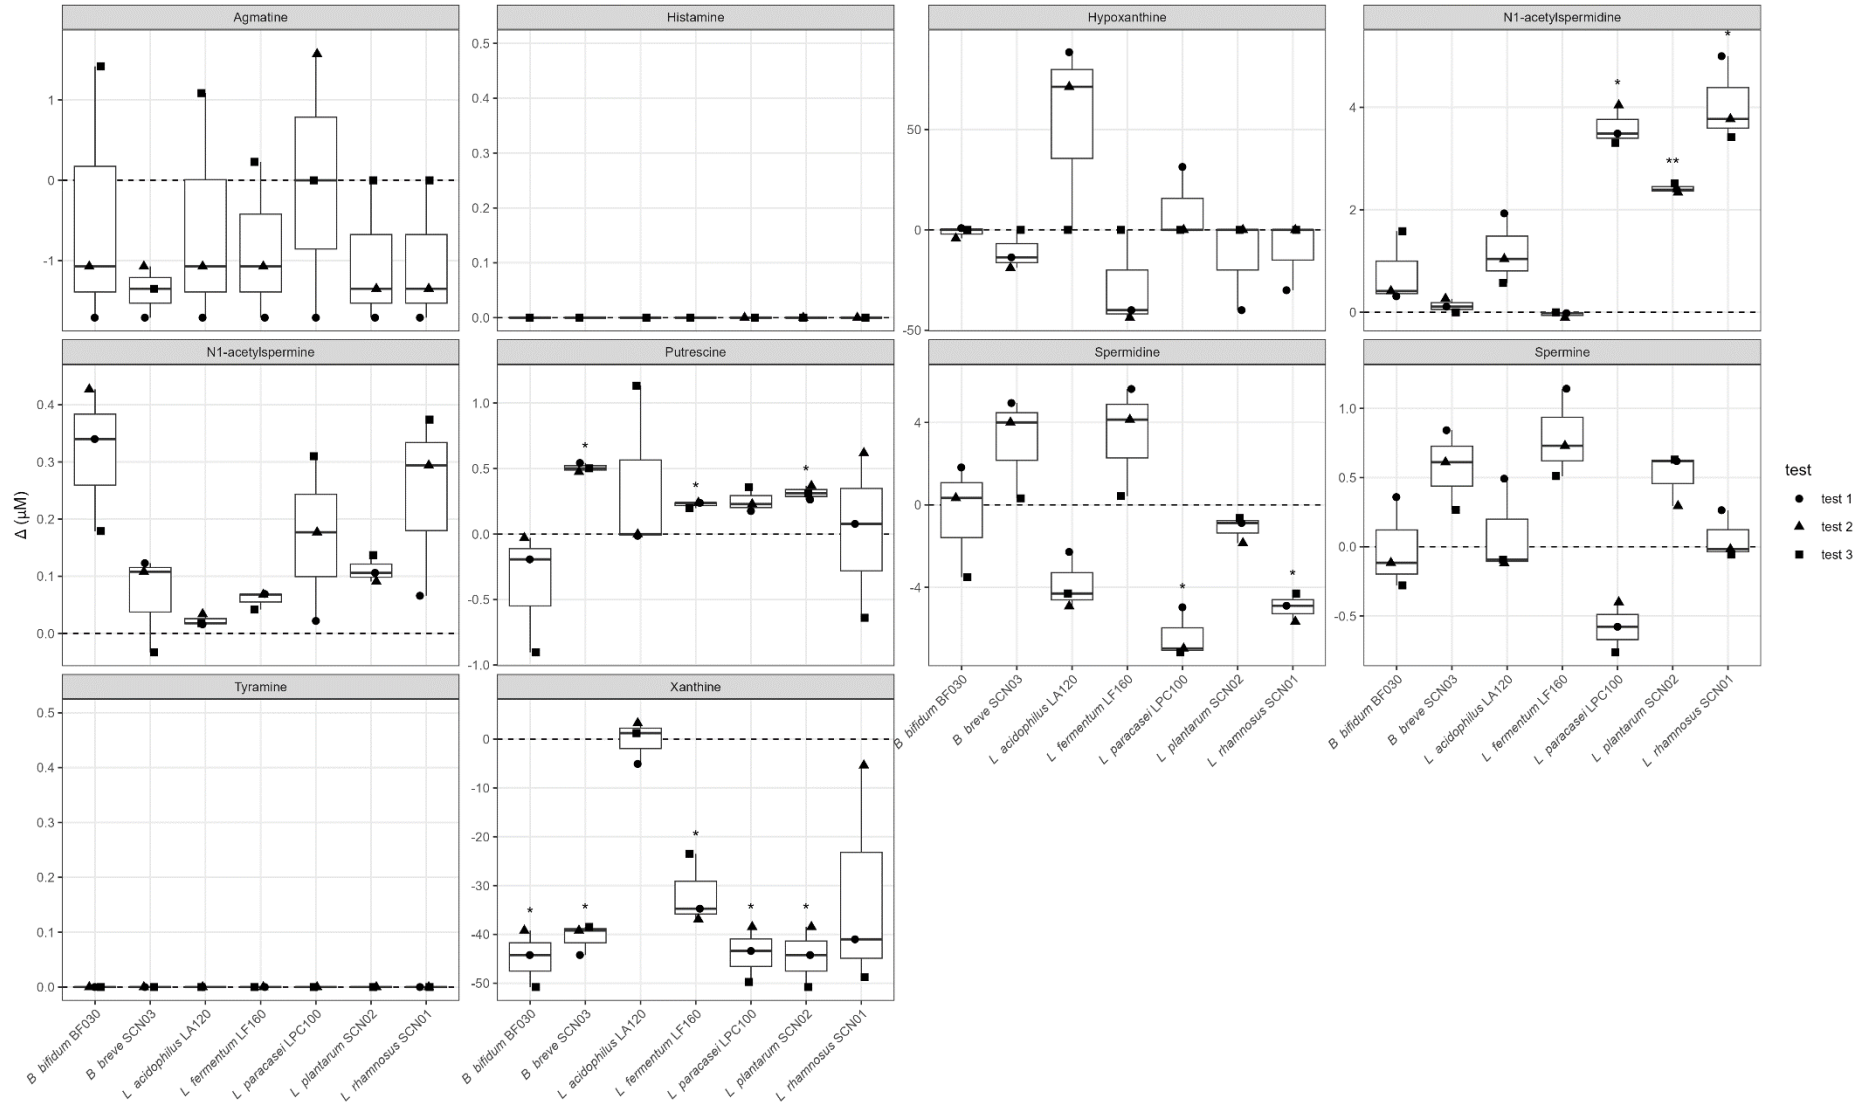

Amino acids & amino acid-related

All raw tests used for per-test correction (sample TEST<sub>x</sub> - MSR TEST<sub>x</sub>). Then, per strain, the 3 raw tests are relabeled as test 1-3. BLANK=missing; NA/<LOD=0; <LOQ=LOQ/2 when possible (else 0). Stars: t-test vs 0; BH/FDR within metabolite.

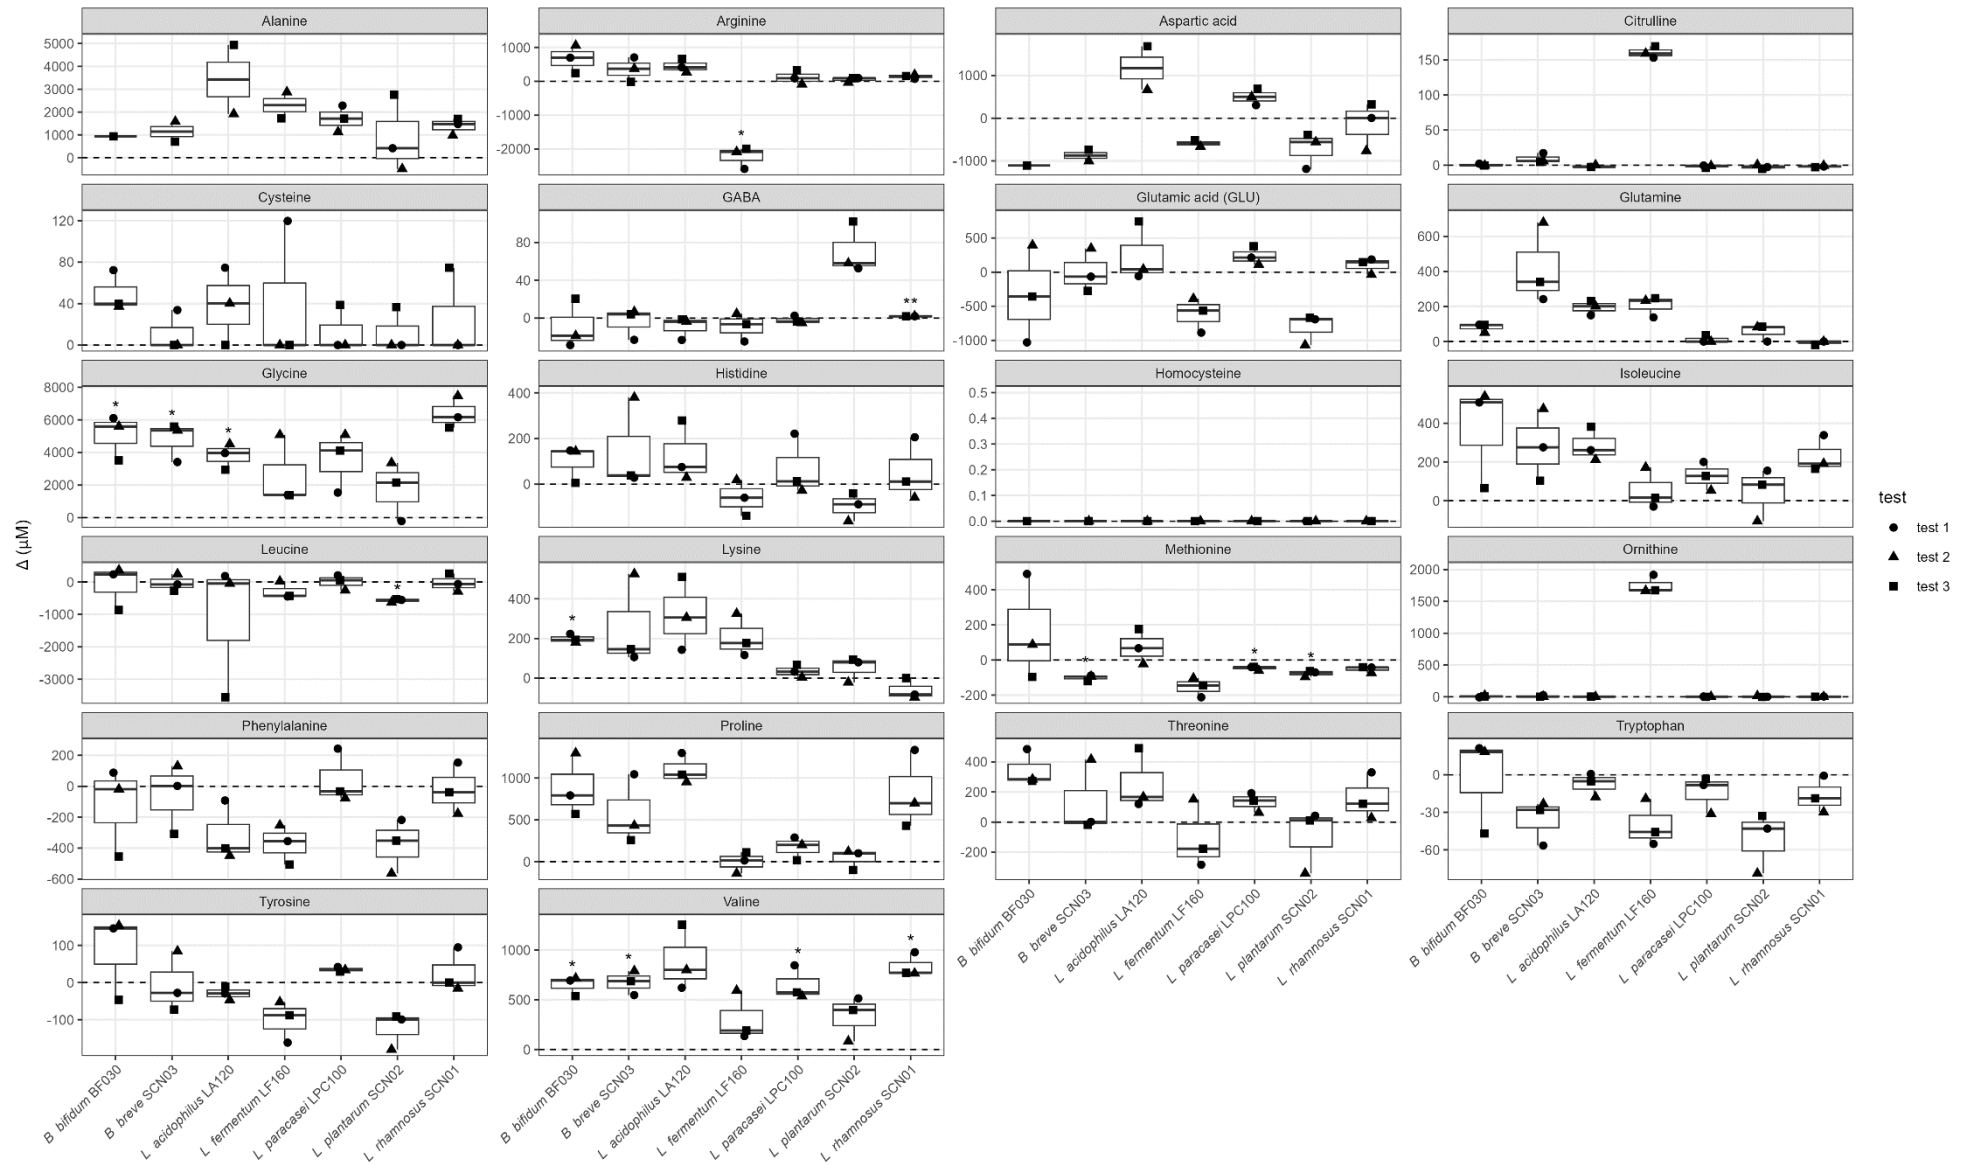

41 **Figure S2. TEER-based assessment of Caco-2 epithelial resistance following exposure to *Bifidobacterium* strains.** (A) Time course of TEER over 0–35 h, expressed  
 42 as percentage of the post-stabilization baseline at  $t = 0$  (baseline = 100%). Data are shown as mean  $\pm$  SD across independent biological experiments; points indicate  
 43 measurements plotted every 3 h and lines connect mean values (shaded bands indicate  $\pm$  SD). (B) Time course shown as in (A) but restricted to the early phase (0–21  
 44 h) to highlight transient differences versus control. (C) Endpoint TEER at 35 h. Dots represent independent biological experiments; diamonds indicate the mean;  
 45 horizontal segments denote mean  $\pm$  SD. (D) Endpoint TEER at 9 h, displayed as in (C), to capture early effects. For panels (C–D),  $n$  denotes the number of independent  
 46 biological experiments per condition. The dashed line marks the baseline (100%) (horizontal in panels A–B; vertical in panels C–D).

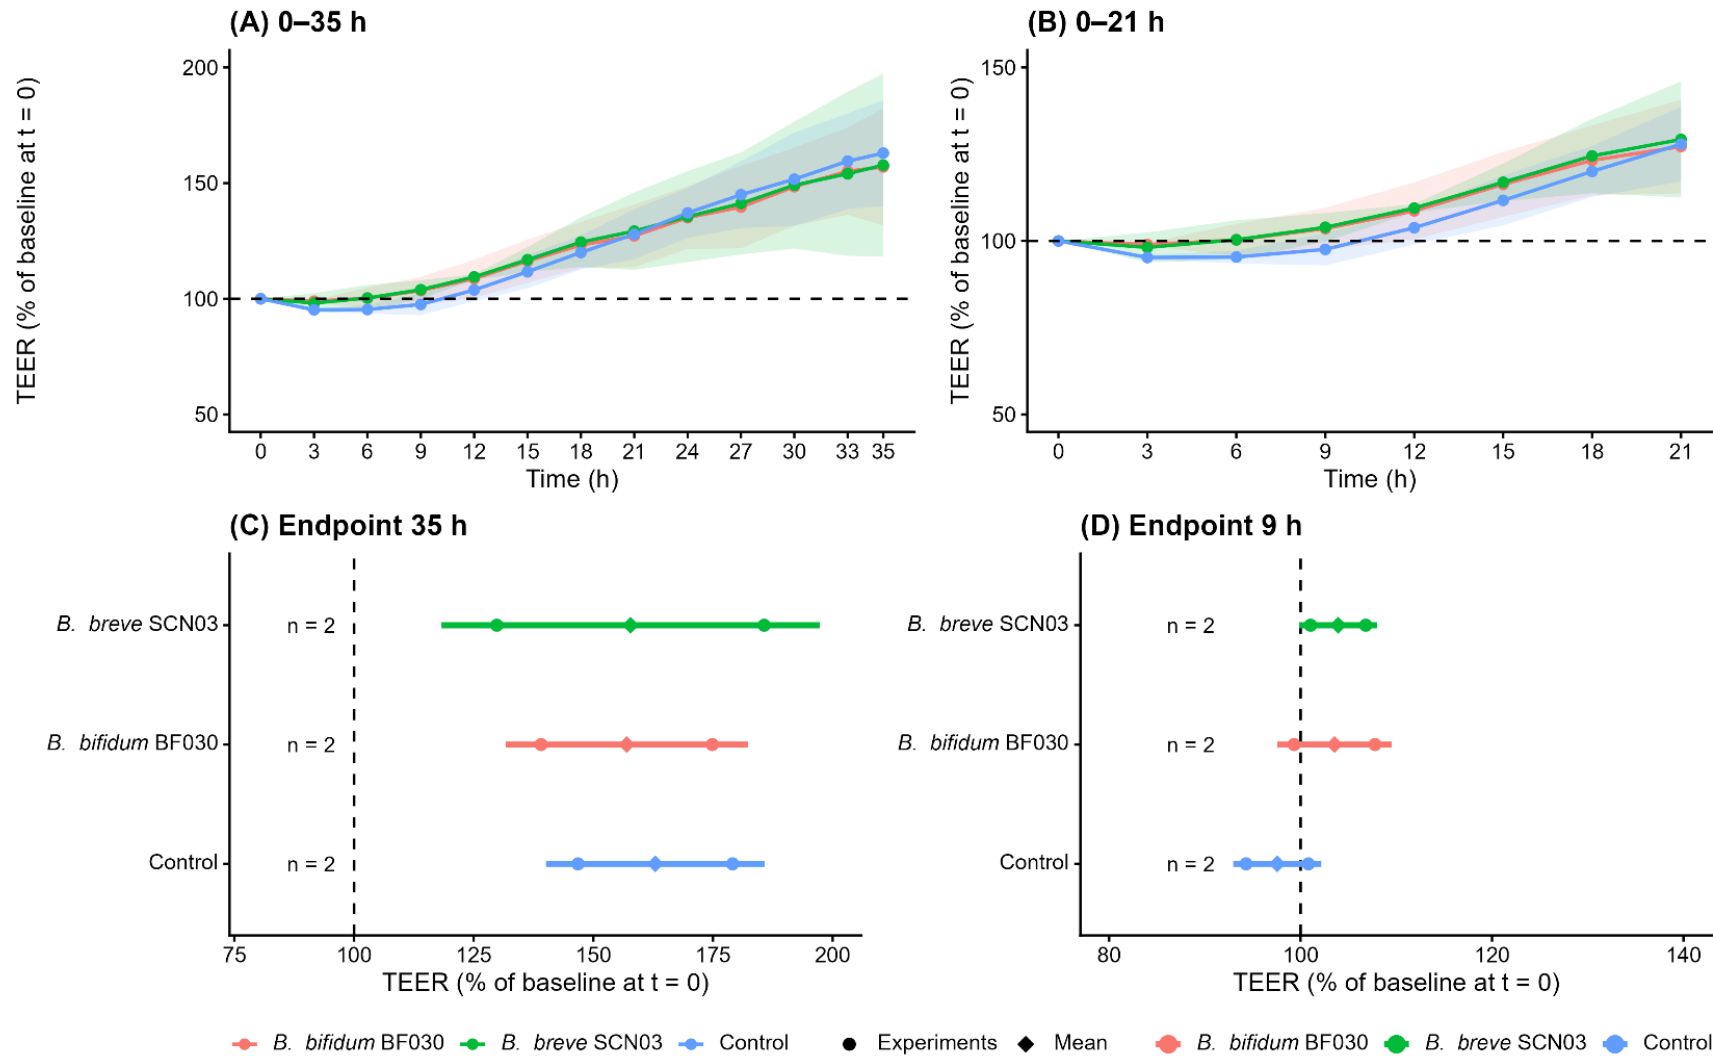

Supplement: Supplementary file 1 [file e6f3e46afdfef8e53cafafd8.pdf]
