# Supplementary material
Source: Research Square preprint supplement (doi:10.21203/rs.3.rs-9069316/v1)
Supplement: Supplementary file 1 [file 96bb0c0d1c1bd7595b5fee34.xlsx]

## Sheet: Dataset S1
Species/strain	Trigonelline	TMAO	Ala	Arg	Asn	Asp	Gln	Glu	Gly	His	Ile	Leu	Lys	Met	Phe	Pro	Ser	Thr	Trp	Tyr	Val	1-Met-His	3-Met-His	5-AVA	AABA	Ac-Orn	ADMA	alpha-AAA	Anserine	BABA	Betaine	c4-OH-Pro	Carnosine	Cit	Creatinine	DOPA	HArg	Kynurenine	Met-SO	Nitro-Tyr	Orn	PAG	PheAlaBetaine	ProBetaine	Sarcosine	SDMA	t4-OH-Pro	Taurine	TrpBetaine
	Alkaloids	Amine Oxides	Aminoacids	Aminoacids	Aminoacids	Aminoacids	Aminoacids	Aminoacids	Aminoacids	Aminoacids	Aminoacids	Aminoacids	Aminoacids	Aminoacids	Aminoacids	Aminoacids	Aminoacids	Aminoacids	Aminoacids	Aminoacids	Aminoacids	Aminoacids Related	Aminoacids Related	Aminoacids Related	Aminoacids Related	Aminoacids Related	Aminoacids Related	Aminoacids Related	Aminoacids Related	Aminoacids Related	Aminoacids Related	Aminoacids Related	Aminoacids Related	Aminoacids Related	Aminoacids Related	Aminoacids Related	Aminoacids Related	Aminoacids Related	Aminoacids Related	Aminoacids Related	Aminoacids Related	Aminoacids Related	Aminoacids Related	Aminoacids Related	Aminoacids Related	Aminoacids Related	Aminoacids Related	Aminoacids Related	Aminoacids Related
B. bifidum BF030	1.07	< LOD	4709	789	684	655	131	2458	6459	197	917	1831	792	339	842	528	961	1034	183	322	1505	0.654	0.85	1.84	6.67	1.15	0.971	2.24	5.54	0.202	293	28.8	17.8	24.7	111	1.06	0.223	0.195	98.8	< LOD	72.5	< LOD	< LOD	0.735	6.44	4.01	73	25.5	< LOD
B. breve SCN03	0.882	< LOD	4345	752	699	1032	606	2819	7003	238	987	1909	608	271	861	600	1112	1079	153	301	1411	0.825	0.853	1.82	6.55	2.05	1.26	2.54	6.06	0.341	308	28.4	20	44.3	102	0.846	0.213	< LOD	97.8	< LOD	39.1	< LOD	< LOD	0.646	6.26	6.22	96.6	27	< LOD
B. lactis BI040	1.02	< LOD	5392	772	709	823	238	2802	7448	226	1059	2120	545	374	927	958	1256	1250	173	418	1948	0.874	0.816	2.79	7.4	1.95	1.31	2.43	5.82	0.215	324	30.2	20.2	30.3	117	1.02	0.274	< LOD	115	< LOD	23.2	< LOD	< LOD	0.77	6	3.57	109	27.9	< LOD
B. longum BL020	1.01	< LOD	4108	799	706	673	959	3274	6522	227	866	1793	771	266	675	696	1145	1063	118	272	1407	0.753	0.746	2.31	6.65	2.55	1.09	3.5	5.74	0.218	325	31.4	20.9	39.5	123	1	0.221	< LOD	112	< LOD	55.3	< LOD	< LOD	0.743	6.63	2.9	99.1	24.8	< LOD
L. acidophilus LA120	1.08	< LOD	3876	704	614	742	152	2293	5689	168	912	1939	545	1.65	801	556	1157	923	120	263	1295	0.505	0.674	2.38	11.9	1.45	1.07	2.74	5.29	0.222	359	31.8	19.2	27	73	0.291	0.192	< LOD	360	< LOD	50.5	< LOD	< LOD	0.859	7.47	3.41	86.6	26.4	< LOD
L. casei LC130	0.963	< LOD	4028	838	40.4	1221	6.03	2632	8189	216	1218	2196	445	356	856	1322	1252	1201	168	303	2076	0.778	0.825	2.14	8.79	1.63	1.03	3.61	4.38	0.392	329	27.7	15.8	21.7	125	1.22	0.32	0.325	70.8	< LOD	11.9	< LOD	< LOD	0.717	6.46	8.55	153	26.3	< LOD
L. fermentum LF160	0.969	< LOD	4414	3.38	271	330	382	1557	6186	142	768	1479	453	174	532	406	833	753	138	148	1194	0.659	0.754	2.05	6.45	3.14	1.02	2.67	5.3	< LOD	301	27.1	17.5	50.6	99.8	0.863	0.523	< LOD	79	< LOD	714	< LOD	< LOD	0.732	6.3	5.59	77.7	24.8	< LOD
L. paracasei LPC100	1.06	< LOD	3823	694	125	1161	9.41	1996	5532	126	770	1684	284	3.07	744	802	855	817	90.9	215	1362	0.504	0.837	2.78	8.67	1.58	0.966	1.74	4.55	0.451	357	31.5	15.6	19.4	76.2	0.492	0.263	0.163	210	< LOD	21	< LOD	< LOD	0.811	7.41	7.5	110	22.7	< LOD
L. plantarum SCN02	1	< LOD	2934	619	254	411	31.8	1521	5583	130	680	1451	361	188	391	601	522	671	90.9	71	1269	0.758	0.832	2.71	7.02	1.41	0.85	3.8	5.04	0.415	303	28.7	17.4	22.6	128	0.431	0.62	< LOD	54.7	< LOD	41.9	< LOD	< LOD	0.811	6.58	10.7	69.1	23.6	< LOD
L. reuteri LU150	0.785	< LOD	4095	0.47	114	423	34.1	2170	6127	2.5	792	1435	262	148	446	810	908	878	114	139	1518	0.727	0.502	1.93	10.7	2.29	0.921	3.07	4.8	0.274	304	28.8	16.7	< LOD	122	0.731	0.671	< LOD	84.5	< LOD	662	< LOD	< LOD	0.659	6.3	2.79	81	24.3	< LOD
L. rhamnosus SCN01	1.26	< LOD	4554	662	81.9	1144	6.78	2487	6982	181	1083	1973	524	188	936	888	1154	968	147	290	1762	0.627	0.901	2.37	13	1.5	1.07	1.68	5.09	0.589	392	38.4	17.8	23.5	102	1.35	0.313	0.035	234	< LOD	27.1	< LOD	< LOD	0.802	8.46	8.06	140	27.1	< LOD
MSR (control, no strain, medium only)	0.846	< LOD	3268	641	584	814	7.09	2500	5129	159	763	1949	468	163	745	457	945	850	154	250	1092	0.49	0.584	2.01	8.03	1.14	0.93	1.98	5.31	0.358	275	32.7	17.7	19.7	79.3	0.665	0.254	< LOD	250	< LOD	27.5	< LOD	< LOD	0.549	6.66	2.15	76.7	26.1	< LOD
[truncated: 54 more columns]
